# Supplementary material for: Influence of Temperature and Polymer Concentration on the Nonlinear Response of Highly Acetylated Chitosan–Genipin Hydrogels
Source: MDPI journal article supplement (doi:10.3390/gels8030194), 2022-03-21
Supplement: s1 [file s1]

# Influence of Temperature and Polymer Concentration on the Nonlinear Response of Highly Acetylated Chitosan–Genipin Hydrogels

Lorenzo Mio <sup>1</sup>, Pasquale Sacco <sup>1,2,3</sup> and Ivan Donati <sup>1,\*</sup>

<sup>1</sup> Department of Life Sciences, University of Trieste, Via Licio Giorgieri 5, I-34127 Trieste, Italy; lorenzo.mio@studenti.units.it

<sup>2</sup> AREA Science Park, Loc. Padriciano 99, I-34149 Trieste, Italy; psacco@units.it

<sup>3</sup> Department of Medicine, Surgery and Health Sciences, University of Trieste, Piazza dell'Ospitale 1, I-34129 Trieste, Italy

\* Correspondence: idonati@units.it

## Supporting Information

*Determination of  $F_A$  for chitosan samples.*

The degree of acetylation for chitosan samples was calculated from the <sup>1</sup>H-NMR spectrum using the integral of the signals reported in figure S1.

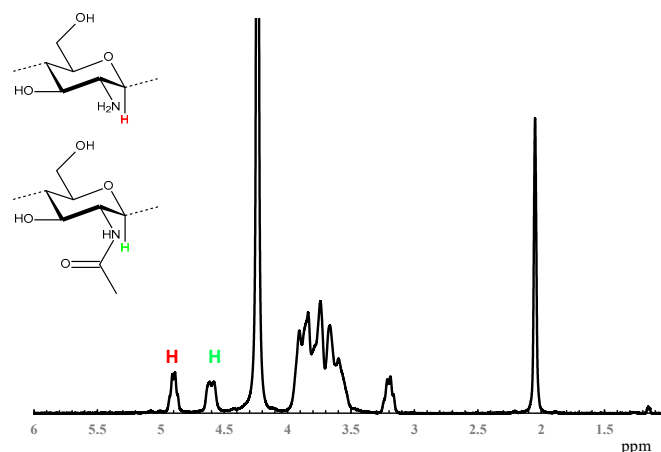

**Figure S1.** <sup>1</sup>H-NMR spectrum of ACh1.

The degree of acetylation,  $F_A$ , was calculated according to eq. S1:

$$F_A = \frac{I_{\text{H}}}{I_{\text{H}} + I_{\text{H}}} \quad (\text{S1})$$

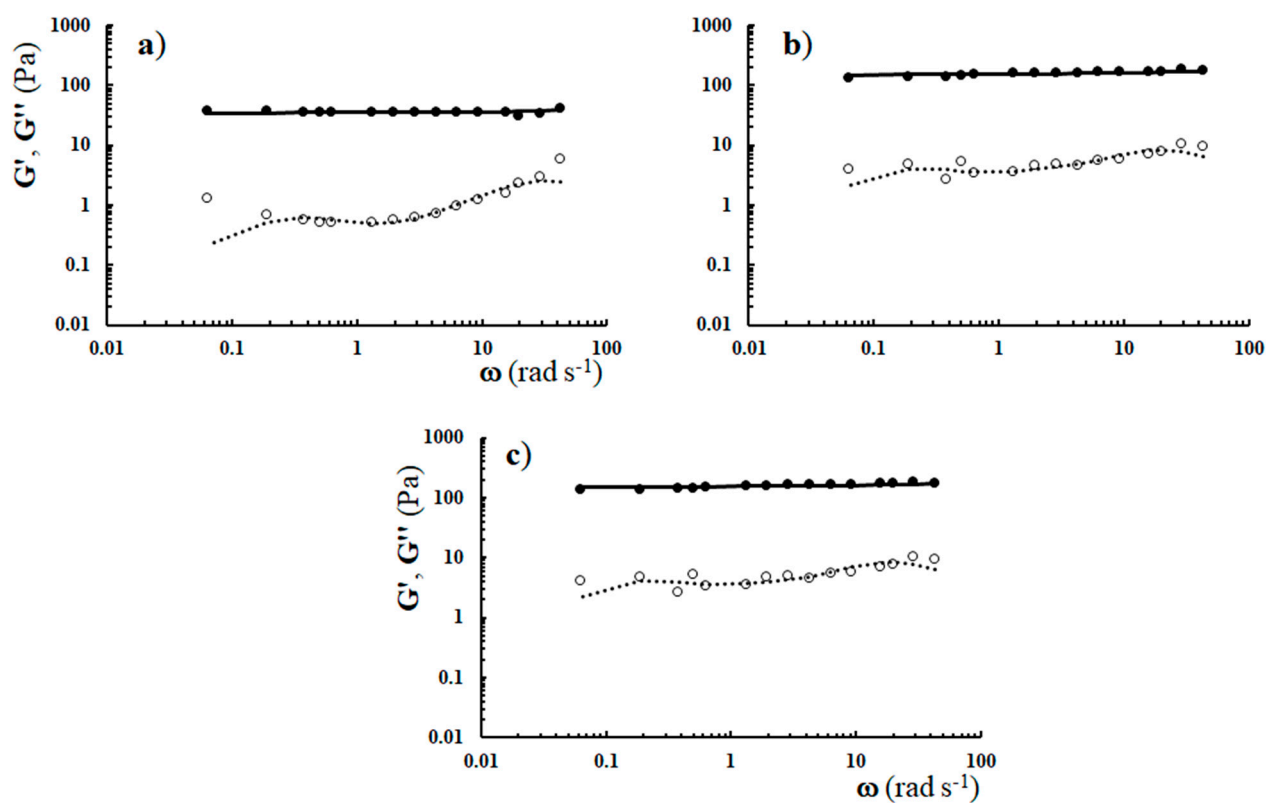

**Figure S2.** Dependence of  $G'$  (filled symbols) and  $G''$  (open symbols) for ACh1 reticulated with genipin (0.31 mM). Chitosan concentration: **a)** 0.8 % (m/V); **b)** 1.0 % (m/V) and **c)** 1.3 % (m/V). Continuous line and dashed line represent the best fit of the experimental data using the generalized Maxwell model (eqs. 1 and 2).

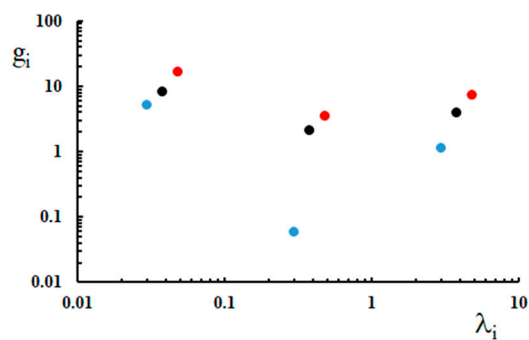

**Figure S3.** Dependence of  $g_i$  from  $\lambda_i$  obtained from the fitting of Figure S2 for ACh1 reticulated with genipin (0.31 mM). Chitosan concentration = 0.8 % (m/V) (blue); 1.0 % (m/V) (black) and 1.3 % (m/V) (red).

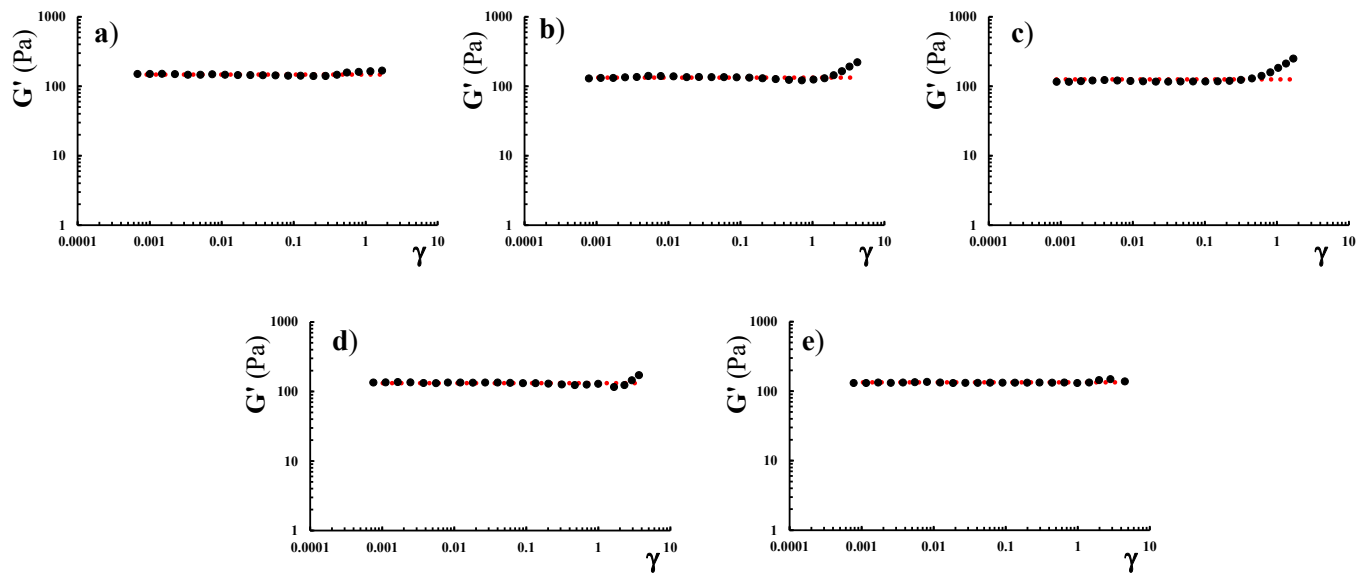

**Figure S4.** Stress sweep for ACh1 1% reticulated with genipin (RD/G = 90) at **a)** 37 °C, **b)** 45 °C, **c)** 60 °C, **d)** 70 °C and **e)** 80 °C. The red dotted curve is the best fit of the experimental curves using the Soskey-Winter equation (eq. 4).
